# Supplementary material for: Ionic liquid- and surfactant-controlled crystallization of WO3 films
Source: Royal Society of Chemistry journal article supplement (doi:10.1039/c5cp01869b), 2015-01-01
Supplement: c5cp01869b1.pdf [file c5cp01869b1.pdf]

## Electronic Supplementary Material (ESI)

### Surfactant-Controlled Crystallization of WO<sub>3</sub> films

Helena Kaper,<sup>a,b</sup> Igor Djerdj,\*<sup>c</sup> Silvia Gross,<sup>d</sup> Heinz Amenitsch,<sup>e</sup> Markus Antonietti<sup>a</sup> and Bernd M. Smarsly\*<sup>f</sup>

<sup>a</sup>Max-Planck Institute of Colloids and Interfaces, Dept Colloid Chem, D-14424 Potsdam, Germany.

<sup>b</sup>Ceramic Synthesis and Functionalization Laboratory UMR 3080,843 06 Cavaillon, France.

<sup>c</sup>Ruder Bošković Institute, Bijenička 54, 10000 Zagreb, Croatia  
Fax: +38514680114; Tel: +38514680113; E-mail: [igor.djerdj@irb.hr](mailto:igor.djerdj@irb.hr).

<sup>d</sup>IENI-CNR, Dipartimento di Scienze Chimiche, Università degli Studi di Padova, and INSTM UdR Padova, via Marzolo 1,5131-Padova, Italy.

<sup>e</sup>Austrian Acad Sci, Inst Biophys & Xray Struct Res, A-8043 Graz, Austria.

<sup>f</sup>Institute of Physical Chemistry, Heinrich-Buff-Ring 58, D-35392 Giessen, Germany  
Fax: +49 641 99-34509; Tel: +49 641 99-34590;  
E-mail: [bernd.smarsly@phys.chemie.uni-giessen.de](mailto:bernd.smarsly@phys.chemie.uni-giessen.de).

**Table S1.** Results obtained from the Rietveld refinement of the compounds under study.

| SAMPLE                                            | 570 <sup>o</sup> C                                                                                |                                                                | 585 <sup>o</sup> C                                                                                |                                                                |
|---------------------------------------------------|---------------------------------------------------------------------------------------------------|----------------------------------------------------------------|---------------------------------------------------------------------------------------------------|----------------------------------------------------------------|
|                                                   | monoclinic-WO <sub>3</sub>                                                                        | orthorhombic-WO <sub>3</sub>                                   | monoclinic-WO <sub>3</sub>                                                                        | orthorhombic-WO <sub>3</sub>                                   |
| Space group                                       | <i>P2<sub>1</sub>/n</i> (14)                                                                      | <i>Pmnb</i> (62)                                               | <i>P2<sub>1</sub>/n</i> (14)                                                                      | <i>Pmnb</i> (62)                                               |
| Lattice parameters (Å)                            | <i>a</i> =7.233(4)<br><i>b</i> =7.497(5)<br><i>c</i> =7.270(4)<br><i>β</i> =91.12(2) <sup>o</sup> | <i>a</i> =7.186(5)<br><i>b</i> =7.332(4)<br><i>c</i> =7.623(4) | <i>a</i> =7.211(3)<br><i>b</i> =7.685(4)<br><i>c</i> =7.255(4)<br><i>β</i> =91.45(2) <sup>o</sup> | <i>a</i> =7.241(4)<br><i>b</i> =7.372(2)<br><i>c</i> =7.563(2) |
| Preferred orientation parameter (direction [200]) | 1.1(2)                                                                                            | -0.06(4)                                                       | 3.1(3)                                                                                            | 0.08(4)                                                        |
| Cell volume (Å <sup>3</sup> )                     | 394.2(3)                                                                                          | 401.8(4)                                                       | 401.9(2)                                                                                          | 403.8(2)                                                       |
| Average isotropic apparent crystallite size (nm)  | 10.7                                                                                              | 7.1                                                            | 18.6                                                                                              | 7.9                                                            |
| Phase composition (wt %)                          | 16.9(5)                                                                                           | 83.1(4)                                                        | 4.1(5)                                                                                            | 95.9(4)                                                        |
| R <sub>wp</sub> (%)                               | 10.2                                                                                              |                                                                | 6.1                                                                                               |                                                                |
| Goodness of fit (χ <sup>2</sup> )                 | 5.26                                                                                              |                                                                | 3.26                                                                                              |                                                                |

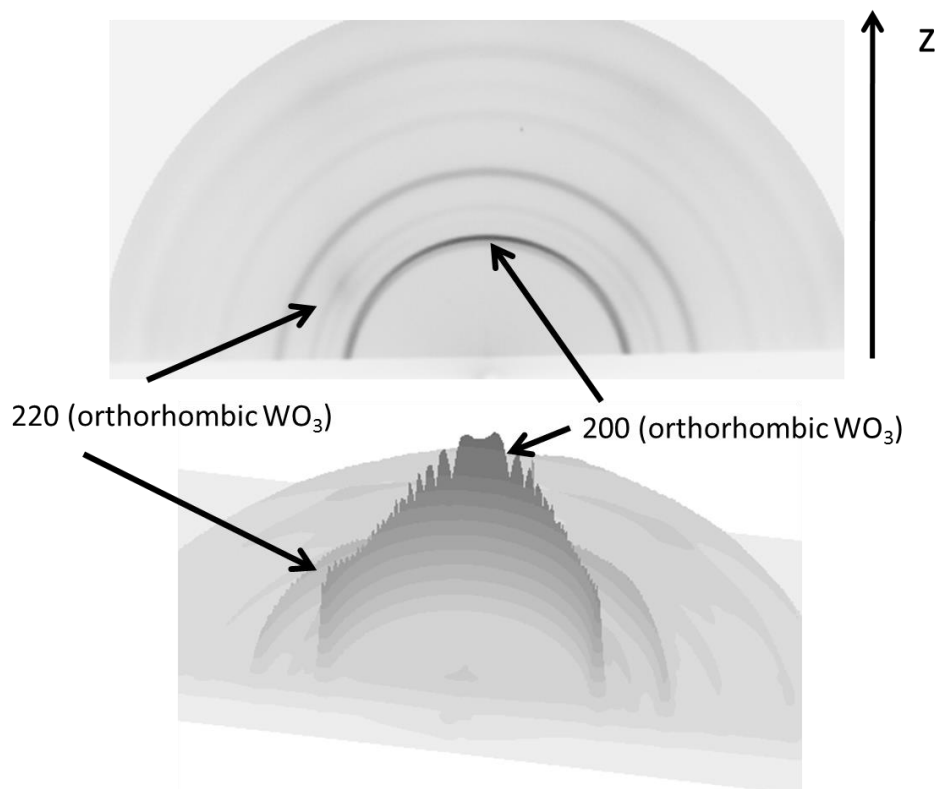

**Fig. S1** 2D XRD data, taken in grazing incidence geometry, on a  $\text{WO}_3$  film treat at  $575\text{ }^\circ\text{C}$ . The bottom figure (linear scale for the intensity) represents the height profile of the upper 2D XRD data. The oscillating maxima seen in the bottom file are an artefact generated by the evaluation software and do not correspond to real scattering maxima.

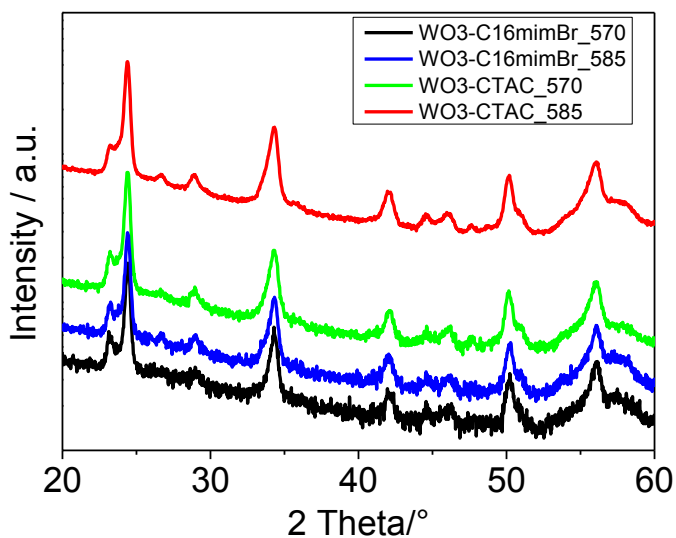

**Fig. S2:** XRD pattern of thin  $\text{WO}_3$  films prepared using CTAC as surfactant, as well as  $\text{C}_{16}\text{mimBr}$ , both treated at  $570^\circ\text{C}$  and  $585^\circ\text{C}$ . It is seen that the crystallographic orientation is less pronounced for all these samples compared to  $\text{WO}_3$  films prepared using  $\text{C}_{16}\text{mimCl}$  under otherwise identical conditions.

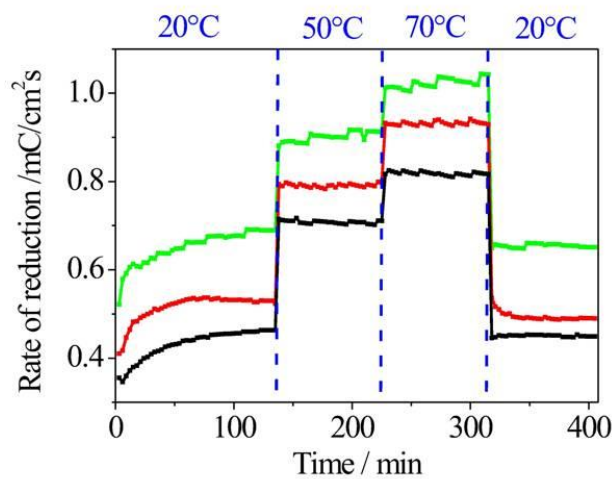

**Fig. S3.** Temperature- and time dependence of the rate of reduction of  $\text{WO}_3$ -films annealed at  $560^\circ\text{C}$  (red curve, film a),  $570^\circ\text{C}$  (green curve, film b) and  $585^\circ\text{C}$  (black curve, film c).
